# Supplementary material
Source: PubMed Central journal article supplement (PMC5875916)
Supplement: NIHMS920570-supplement-supplement_1.pdf [file NIHMS920570-supplement-supplement_1.pdf]

Table S1. *Estimates of Fixed Effects From Mixed Models Testing Treatment Effects Over Course of Follow-Up for Acute Treatment Responders<sup>a</sup>*

|                            | $\beta$ | <i>SE</i> | <i>p</i> |
|----------------------------|---------|-----------|----------|
| <u>CYBOCS</u>              |         |           |          |
| Group                      | .05     | 1.29      | .97      |
| Baseline to follow-up      | -15.79  | 1.06      | <.001    |
| Posttreatment to follow-up | -0.88   | 0.99      | .38      |
| <u>COIS-RP</u>             |         |           |          |
| Group                      | 1.49    | 3.93      | .71      |
| Baseline to follow-up      | -9.25   | 2.28      | <.001    |
| Posttreatment to follow-up | -0.57   | 1.72      | .74      |
| <u>FAS</u>                 |         |           |          |
| Group                      | 1.06    | 2.20      | .63      |
| Baseline to follow-up      | -18.85  | 2.30      | <.001    |
| Posttreatment to follow-up | -0.46   | 1.29      | .72      |
| <u>FES-Conflict</u>        |         |           |          |
| Group                      | 0.35    | 0.66      | .60      |
| Baseline to follow-up      | -0.89   | 0.28      | .003     |
| Posttreatment to follow-up | 0.09    | 0.16      | .60      |
| <u>FES-Cohesion</u>        |         |           |          |
| Group                      | .07     | 0.57      | .90      |
| Baseline to follow-up      | 0.47    | 0.27      | .09      |
| Posttreatment to follow-up | 0.11    | 0.26      | .66      |
| <u>PABS</u>                |         |           |          |
| Group                      | .02     | 0.93      | .99      |
| Baseline to follow-up      | -3.54   | 0.84      | <.001    |
| Posttreatment to follow-up | -0.30   | 0.47      | .53      |

*Note.* For treatment condition, standard treatment serves as the reference group. For time, follow-up serves as the reference group. COIS-RP = Child Obsessive-Compulsive Disorder (OCD) Impairment Scale – Parent-Report Revised; CYBOCS = Children’s Yale-Brown Obsessive Compulsive Scale; FAS = Family Accommodation Scale; FES = Family Environment Scale; PABS = Parental Attitudes and Behaviors Scale.

<sup>a</sup> Regardless of condition, acute treatment responders maintained improvements at follow-up, with improved outcomes at follow-up compared to baseline.
